# Supplementary material for: Luteinizing Hormone Beta Mutation and Hypogonadism in Men and Women
Source: Atypon-hosted journal article supplement (doi:10.1056/nejmoa071999), 2007-08-29
Supplement: nejm_lofrano_897sa1.pdf [file nejm_lofrano_897sa1.pdf]

## Supplementary Appendix

This appendix has been provided by the authors to give readers additional information about their work.

Supplement to: Lofrano-Porto A, Barra GB, Giacomini LA, et al. Luteinizing hormone beta mutation and hypogonadism in men and women. *N Engl J Med* 2007;357:897-904.

## ONLINE APPENDIX

**Table S1. Hormonal data of six consanguineous family members heterozygotes for the IVS2+1G>C mutation in the luteinizing hormone beta-subunit gene**

| Subjects          | Sex | Age (yr) | LH (IU/L) |                   | FSH (IU/L) |                   | E <sub>2</sub><br>(pg/mL) | T<br>(ng/dL) | Free α<br>(ng/L) | In B<br>(pg/mL) | Phenotype              |
|-------------------|-----|----------|-----------|-------------------|------------|-------------------|---------------------------|--------------|------------------|-----------------|------------------------|
|                   |     |          | Baseline  | Peak <sup>a</sup> | Baseline   | Peak <sup>a</sup> |                           |              |                  |                 |                        |
| I-1               | M   | 76       | 5.0       |                   | 4.9        |                   | 27.4*                     | 567          | 456.8            | 185             | Fertile                |
| I-2               | F   | 66       | 6.4       | 20.0              | 33.9       | 49.9              | < 13                      | 43.8*        | 575.5            | < 10            | Fertile/<br>menopause  |
| II-2              | F   | 49       | 17.6      |                   | 31.5       |                   | 56                        | 31.3*        | 1486.3           | 48              | Fertile/<br>climateric |
| II-7 <sup>b</sup> | F   | 36       | <0.6      | 23.6              | 4.8        | 24.7              |                           |              |                  |                 | Fertile                |
| II-14             | M   | 25       | 4.2       | 15.2              | 6.0        | 10.6              | 43.3*                     | 542          | 447.4            | 62              | Fertile                |
| III-3             | M   | 28       | 1.44*     |                   | 2.26*      |                   | 32.9*                     | 577*         |                  |                 | Fertile                |
| Normal range:     |     |          |           |                   |            |                   |                           |              |                  |                 |                        |
| M                 |     |          | 1.0-8.4   | 12-29.7           | 0.6-10.5   | 2.9-7.8           | <35                       | 271-965      | 120-790          | 80-300          |                        |
| F:                |     |          |           |                   |            |                   |                           |              |                  |                 |                        |
| follicular        |     |          | 2.2-6.8   | 7.6-31.7          | 2.4-9.3    | 4.6-11.7          | 22-215                    |              | 80-604           | 15-90           |                        |
| menopause         |     |          | 15-64     |                   | 31-134     |                   |                           |              | 340-400          |                 |                        |

Luteinizing hormone (LH), Follicle-stimulating hormone (FSH), Estradiol (E<sub>2</sub>), Testosterone (T) and Free alpha-subunit (Free α) were measured by an immunofluorimetric assay (autoDELFLIA); Inhibin B (In B) was measured by an enzyme immunoassay (Active Inhibin B ELISA, Diagnostics).

\*Values marked with an asterisk were determined by a chemiluminescent immunoassay (IMMULITE).

**a.** LH and FSH levels at peak after GnRH stimulation.

**b.** Subject II-7 was pregnant at the time of the first evaluation. Basal and GnRH-stimulated LH and FSH levels were obtained after five month of childbirth, when she was still nursing.

**Figure S1.** Nucleotides and predicted amino acid sequence of wild type (wt) and mutant *LHB* exon 2, intron 2 and exon 3. Exonic sequences are underlined and intron 2 sequence is in italic. The *LHB* gene NCBI reference sequence ref[NC\_000019.8|NC\_000019:c54212159-54211049] was identical to the mutant

gene amplified fragment, except for the mutated nucleotide (shown in red). Intron 2 retention resulted in the insertion of 79 amino acids and in exon 3 frameshift. The predicted aberrant protein would lack important regions encoded by exon 3, such as the seat belt region, formed by amino acids 90-110 (light gray), and also some cysteine residues at positions 57, 88 and 90 (yellow), essential for the cysteine knot formation. Numbers above each series refer to amino acid positions in the *LHB* wt mature protein. (GenBank accession number for *LHB* IVS2+1G>C is EF621778).

|    |                                                                                                                              |        |
|----|------------------------------------------------------------------------------------------------------------------------------|--------|
| 1  | G L L L L L L L L L S M G G A W A S R                                                                                        | WT     |
|    | <u>GGGCTGCTGC TGTTGCTGCT GCTGAGCATG GGCGGGGCAT GGGCATCCAG</u>                                                                |        |
|    | G L L L L L L L L L S M G G A W A S R                                                                                        | Mutant |
| 10 | E P L R P W C H P I N A I L A V E                                                                                            | WT     |
|    | <u>GGAGCCGCTT CGGCCATGGT GCCACCCCAT CAATGCCATC CTGGCTGTCTG</u>                                                               |        |
|    | E P L R P W C H P I N A I L A V E                                                                                            | Mutant |
| 20 | 30                                                                                                                           |        |
|    | K E G C P V C I T V N T T I C A                                                                                              | WT     |
|    | <u>AGAAGGAGGG CTGCCAGTG TGCATCACCG TCAACACCAC CATCTGTGCC</u>                                                                 |        |
|    | K E G C P V C I T V N T T I C A                                                                                              | Mutant |
| 40 | G Y C P T M .....                                                                                                            | WT     |
|    | <u>GGCTACTGCC CCACCATG</u> <span style="background-color: red; color: red;">T</span> <u>GAGCTGCCTG GGGCCAGGGG CAGATGCTGC</u> |        |
|    | G Y C P T M L S C L G P G A D A A                                                                                            | Mutant |
|    | .....                                                                                                                        | WT     |
|    | <u>CACCTCAGGG CCAGACCCAC AGAGGCAGCG GGGGAGGAAG GGTGGTCTGC</u>                                                                |        |
|    | T S G P D P Q R Q R G R K G G L P                                                                                            | Mutant |
|    | .....                                                                                                                        | WT     |
|    | <u>CTCTCTGGCC TGCGGTTGGG GAATGGGGTG TGGGAAGGCA GGAACAGAGG</u>                                                                |        |
|    | L W P A V G E W G V G R Q E Q R                                                                                              | Mutant |
|    | .....                                                                                                                        | WT     |
|    | <u>GCTTCCTGGG CTCCTGAGTC CAGGACCTGT GGGGTCAGCT TGGGAGCTCA</u>                                                                |        |
|    | A S W A P E S R T C G V S L G A Q                                                                                            | Mutant |
|    | .....                                                                                                                        | WT     |
|    | <u>GCTGAGGCGC TGGCCTCAGG CACATGCTCA TTCCCCACT CACACGGCCT</u>                                                                 |        |
|    | L R R W P Q A H A H S P T H T A S                                                                                            | Mutant |
| 50 | ....M R V L Q A V L P P L P Q V V <span style="background-color: yellow;">C</span>                                           | WT     |
|    | <u>CCAGATGCGC GTGCTGCAGG CGGTCCTGCC GCCCCTGCCT CAGGTGGTGT</u>                                                                |        |
|    | R C A C C R R S C R P C L R W C                                                                                              | Mutant |

|                                                               |       |                     |
|---------------------------------------------------------------|-------|---------------------|
| 60                                                            | 70    |                     |
| T Y R                                                         | D V R | F E S I R L P G C P |
| <u>GCACCTACCG TGATGTGCGC TTCGAGTCCA TCCGGCTCCC TGGCTGCCCG</u> |       |                     |
| A P T V                                                       | M C A | S S P S G S L A A R |
|                                                               |       | WT                  |
|                                                               |       | Mutant              |

|                                                               |         |                     |
|---------------------------------------------------------------|---------|---------------------|
| 80                                                            | 90      |                     |
| R G V D                                                       | P V V   | S F P V A L S C R C |
| <u>CGTGGTGTGG ACCCCGTGGT CTCCTTCCCT GTGGCTCTCA GCTGTCGCTG</u> |         |                     |
| V V W                                                         | T P W S | P S L W L S A V A V |
|                                                               |         | WT                  |
|                                                               |         | Mutant              |

|                                                             |                           |
|-------------------------------------------------------------|---------------------------|
| 100                                                         |                           |
| G P C R R S T                                               | S D C G G P K D H P       |
| <u>TGGACCCTGC CGCCGAGCA CCTCTGACTG TGGGGTCCC AAAGACCACC</u> |                           |
| D P A                                                       | A A A P L T V G V P K T T |
|                                                             | WT                        |
|                                                             | Mutant                    |

|                                                              |                         |  |
|--------------------------------------------------------------|-------------------------|--|
| 110                                                          | 120                     |  |
| L T C                                                        | D H P Q L S G L L F L * |  |
| <u>CCTTGACCTG TGACCACCC CAACTCTCAG GCCTCCTCTT CCTCTAAAGA</u> |                         |  |
| P *                                                          |                         |  |
|                                                              | WT                      |  |
|                                                              | Mutant                  |  |

CCCTCCCCGC AGCCTTCCAA GTCCATCCCG ACTCC
